# Supplementary material
Source: publisher site journal article supplement (https://www.dovepress.com/article/407202)
Supplement: Supplementary file 1 [file get_supplementary_file.php]

Table S1 The linear relationship analysis between continuous variables and logit(p).

| Variables | MLE of lambda | Score Statistic (z) | P |
| --- | --- | --- | --- |
| Creatinine (μmol/L) | 1 | -1.241 | 0.215 |
| Lactic acid (mmol/L) | 1 | -0.715 | 0.475 |
| Prothrombin time (s) | 1 | 0.296 | 0.767 |
| Serum cholinesterase (U/L) | 1 | -0.064 | 0.949 |
| [Red blood cell](javascript:;)s (10^12/L) | 1 | 0.437 | 0.662 |
| Pro-BNP (pg/ml) | 1 | -0.179 | 0.858 |
| [Total bilirubin](javascript:;) (μmol/L) | 1 | 0.580 | 0.562 |
| Albumin (g/L) | 1 | 0.162 | 0.871 |

Pro-BNP, pro-brain natriuretic peptide.

Table S2 Variance inflation factor of variables.

| Variables | VIF |
| --- | --- |
| Serum cholinesterase (U/L) | 1.933 |
| Albumin (g/L) | 1.918 |
| Lactic acid (mmol/L) | 1.518 |
| Creatinine (μmol/L) | 1.485 |
| Pro-BNP (pg/ml) | 1.372 |
| Respiratory failure | 1.202 |
| [Total bilirubin](javascript:;) (μmol/L) | 1.177 |
| Prothrombin time (s) | 1.139 |
| [Red blood cell](javascript:;)s (10*12/L) | 1.123 |
| Gender female | 1.087 |

Pro-BNP, pro-brain natriuretic peptide.

Table S3 The AUCs comparison of models based on logistic regression, SOFA and random forest.

| Model | AUC (95% CI) | Pa |
| --- | --- | --- |
| Logistic regression | 0.826 (0.786-0.866) | - |
| SOFA | 0.777 (0.729-0.825) | 0.002 |
| Random forest | 0.827 (0.788-0.866) | 0.981 |

aThe significance was obtained by comparison to logistic regression model.


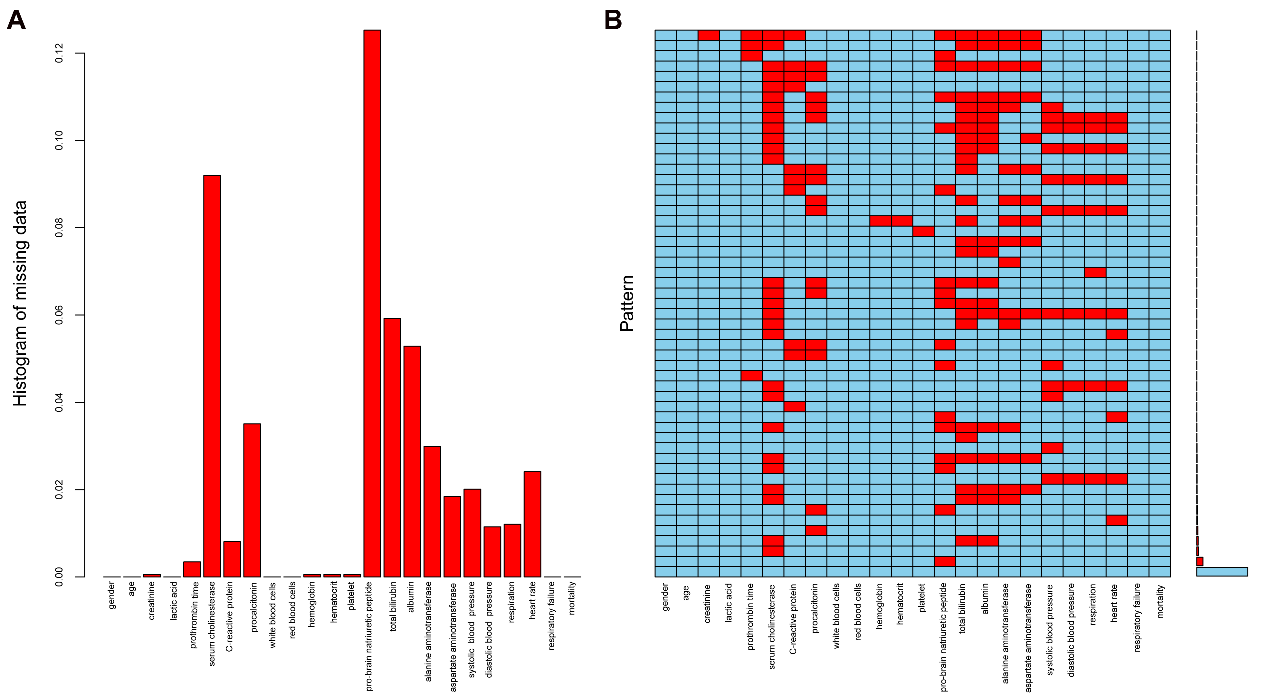
Figure S1. The missing variables for enrolled patients in this study. (A) the number of missing variables; (B) the distribution matrix of missing variables.
